# Supplementary material
Source: PubMed Central journal article supplement (PMC3271772)
Supplement: supp_pp.111.187468_187468Table_S1.pdf [file supp_pp.111.187468_187468Table_S1.pdf]

**Primers used for quantification of immunoprecipitated promoter DNA**

| ChIP primers | Sequence                    | Reference                       |
|--------------|-----------------------------|---------------------------------|
| PR-1 F1      | TCGGTCCCTAGAGTTTTTCAA       | Koorneef <i>et al.</i> , 2008   |
| PR-1 R1      | CCGCCACATCTATGACGTAAG       |                                 |
| PR-1 F2      | GCAAAGCTACCGATACGAAACAATA   | Jaskiewicz <i>et al.</i> , 2011 |
| PR-1 R2      | TTGCAATTGTCCAAATGAATAGAAG   |                                 |
| PDF1-2 F1    | TTCAGTAATAGGTGTGTCCCAGG     | Koorneef <i>et al.</i> , 2008   |
| PDF1-2 R1    | GCGGCTGGTTAATCTGAATGG       |                                 |
| PDF1-2 F2    | TATCGGGCTGCCTCTCTATCAAAT    |                                 |
| PDF1-2 R2    | CCACATGTTTCTTTCAAACCTCTGAT  |                                 |
| WRKY6 F      | CGTGGACCGATTTTGTTTTTC       | Jaskiewicz <i>et al.</i> , 2011 |
| WRKY6 R      | CAATGACGCAGGATCTGACGTA      |                                 |
| WRKY53 F     | GGTGATAAAAATGGATGAGTGTTGG   | Jaskiewicz <i>et al.</i> , 2011 |
| WRKY53 R     | AATTATTTATGGTTTGGTCATTTGGTC |                                 |
